# Supplementary material
Source: PubMed Central journal article supplement (PMC2780789)
Supplement: 0908797106_0908797106SI.pdf [file 0908797106_0908797106SI.pdf]

# Supporting Information

Bergqvist et al. 10.1073/pnas.0908797106

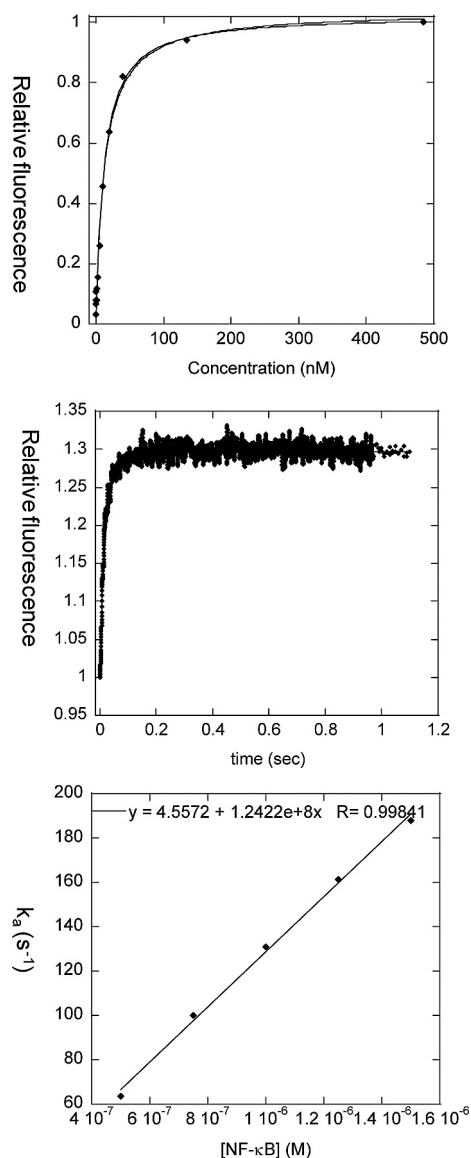

**Fig. S1.** (A) Equilibrium-binding measurements in which the concentration of pyrene DNA was held constant at 0.25  $\mu$ M and increasing amounts of NF- $\kappa$ B(p50<sub>(19–363)</sub>/p65<sub>(1–325)</sub>) protein were added. The concentration of the pyrene DNA was 5 nM, and the ratios of DNA:NF- $\kappa$ B used ranged from 100:1 to 1:100. The data were fit by 2 different equations: Michaelis-Menton  $m1 \cdot x / (m2 + x)$ , where  $m1$  is the fluorescence amplitude and  $m2$  is  $K_d$ , and the quadratic equation  $m1 \cdot ((m2 + m3 + x) - ((m2 + m3 + x)^2 - 4 \cdot m3 \cdot x)^{1/2}) / (2 \cdot m3)$ , where  $m1$  is the maximum fluorescence;  $m2$  is  $K_d$ , and  $m3$  is the NF- $\kappa$ B concentration. As expected, the fits gave identical results because the experiment was performed at low concentrations near the  $K_d$ . (B) Stopped-flow kinetic measurements of the binding of pyrene DNA to NF- $\kappa$ B(p50<sub>(19–363)</sub>/p65<sub>(1–325)</sub>) were performed in which the pyrene DNA concentration was fixed at 0.25  $\mu$ M and different concentrations of NF- $\kappa$ B were added. The equation used to extrapolate the on-rate was  $Y = m1 + m2 \cdot \exp(-m3 \cdot x)$ , where  $m1$  is maximum fluorescence value,  $m2$  is the amplitude of fluorescence, and  $m3$  corresponds to the  $K_D$ . The figure shows a representative trace in which the concentration of NF- $\kappa$ B was 0.5  $\mu$ M. In total, 9 concentrations were analyzed, and each concentration was analyzed 6 separate times. (C) The observed association rates from the experiments in (B) are plotted vs. NF- $\kappa$ B, and the resulting line is fit to a linear equation where the intercept is  $k_{off}$  and the slope is  $k_{on}$ , yielding values of  $k_{on}$  of  $1.2 \pm 0.070 \times 10^8 \text{ M}^{-1} \text{ s}^{-1}$  and  $k_{off}$  of  $4.56 \pm 0.94 \text{ s}^{-1}$ . The ratio  $k_{off}/k_{on}$  provided  $K_d$  of  $37 \pm 3.9 \text{ nM}$ , which, as expected, was not consistent with the value obtained with the equilibrium-binding measurements because the concentration of the pyrene-DNA is above the  $K_d$ .

**Table S1. Binding of NF- $\kappa$ B homo- and heterodimers to various  $\kappa$ B DNA sites**

| NF- $\kappa$ B                                  | DNA           | $k_a (\times 10^6 \text{ M}^{-1}\text{s}^{-1})$ | $k_d (\times 10^{-3} \text{ s}^{-1})$ | $K_{D,BIA} (\times 10^{-9} \text{ M}^{-1})$ |
|-------------------------------------------------|---------------|-------------------------------------------------|---------------------------------------|---------------------------------------------|
| <b>Heterodimer</b>                              |               |                                                 |                                       |                                             |
| p50 <sub>(39–376)</sub> /p65 <sub>(1–325)</sub> | Ig $\kappa$ B | $1.2 \pm 0.2$                                   | $7.3 \pm 0.7$                         | $6.3 \pm 0.7$ (25°C)                        |
| p50 <sub>(39–376)</sub> /p65 <sub>(1–325)</sub> | Ig $\kappa$ B | $1.2 \pm 0.3$                                   | $17 \pm 0.5$                          | $14.7 \pm 0.6$ (37°C)                       |
| p50 <sub>(39–376)</sub> /p65 <sub>(1–325)</sub> | MIP2          | 0.52                                            | 5.1                                   | 9.9                                         |
| p50 <sub>(39–376)</sub> /p65 <sub>(1–325)</sub> | RANTES        | 2.0                                             | 7.4                                   | 3.7                                         |
| p50 <sub>(39–376)</sub> /p65 <sub>(1–325)</sub> | UK            | 1.1                                             | 33.7                                  | 31.9                                        |
| p50 <sub>(39–376)</sub> /p65 <sub>(1–325)</sub> | IFN           | 2.1                                             | 13.7                                  | 6.7                                         |
| <b>Homodimer</b>                                |               |                                                 |                                       |                                             |
| p65 <sub>(19–325)</sub> /p65 <sub>(1–325)</sub> | Ig $\kappa$ B | 0.015                                           | 104                                   | 7370                                        |
| p65 <sub>(19–325)</sub> /p65 <sub>(1–325)</sub> | MIP2          | 0.59                                            | 13.2                                  | 22.3                                        |
| p65 <sub>(19–325)</sub> /p65 <sub>(1–325)</sub> | RANTES        | 0.63                                            | 25.9                                  | 41.2                                        |
| p65 <sub>(19–325)</sub> /p65 <sub>(1–325)</sub> | UK            | 0.66                                            | 80.0                                  | 124                                         |
| p65 <sub>(19–325)</sub> /p65 <sub>(1–325)</sub> | IFN           | 1.08                                            | 22.9                                  | 21.2                                        |

Binding was done in 20 mM Tris (pH 7.5), 150 mM NaCl, 10% glycerol.

**Table S2. Binding of NF- $\kappa$ B(p50<sub>(19–363)</sub>/p65<sub>(1–325)</sub>) to I $\kappa$ B $\alpha$  and rates of dissociation**A. Binding of NF- $\kappa$ B(p50<sub>(19–363)</sub>/p65<sub>(1–325)</sub>) at 37 °C to truncated I $\kappa$ B $\alpha$ s and rates of dissociation

| DNA           | I $\kappa$ B                   | $k_a$ ( $\times 10^6$ M <sup>-1</sup> s <sup>-1</sup> ) | $k_d$ ( $\times 10^{-3}$ s <sup>-1</sup> ) | $K_D$ (nM)        | Active dissociation rate ( $\times 10^5$ M <sup>-1</sup> s <sup>-1</sup> ) |
|---------------|--------------------------------|---------------------------------------------------------|--------------------------------------------|-------------------|----------------------------------------------------------------------------|
| Ig $\kappa$ B | I $\kappa$ B $\alpha$ (67–317) | 3.3 $\pm$ 0.6                                           | 0.14 $\pm$ 0.055                           | 0.045 $\pm$ 0.01  | 9.3                                                                        |
| Ig $\kappa$ B | I $\kappa$ B $\alpha$ (67–287) | 3.7 $\pm$ 0.1                                           | 0.15 $\pm$ 0.014                           | 0.039 $\pm$ 0.003 | 9.4 $\pm$ 1.4                                                              |
| Ig $\kappa$ B | I $\kappa$ B $\alpha$ (67–281) | 0.9 $\pm$ 0.3                                           | 2.2 $\pm$ 0.075                            | 2.47 $\pm$ 0.16   | 5.9                                                                        |
| Ig $\kappa$ B | I $\kappa$ B $\alpha$ (67–275) | 1.9 $\pm$ 0.1                                           | 39.8 $\pm$ 2.2                             | 20.7 $\pm$ 0.1    | 1.4                                                                        |

B. Binding of NF- $\kappa$ B(p50<sub>(19–363)</sub>/p65<sub>(1–325)</sub>) at 37 °C to mutants of I $\kappa$ B $\alpha$  and rates of dissociation

| DNA           | I $\kappa$ B $\alpha$ (67–287) | $k_a$ ( $\times 10^6$ M <sup>-1</sup> s <sup>-1</sup> ) | $k_d$ ( $\times 10^{-3}$ s <sup>-1</sup> ) | $K_D$ (nM)        | Rel. $K_D$      | Active dissociation rate ( $\times 10^5$ M <sup>-1</sup> s <sup>-1</sup> ) |
|---------------|--------------------------------|---------------------------------------------------------|--------------------------------------------|-------------------|-----------------|----------------------------------------------------------------------------|
| Ig $\kappa$ B | C186P,A220P                    | 3.3 $\pm$ 0.2                                           | 0.16 $\pm$ 0.02                            | 0.048 $\pm$ 0.008 | 1               | 7.3 $\pm$ 0.4                                                              |
| Ig $\kappa$ B | Q111G,C186P,A220P              | 0.98 $\pm$ 0.09                                         | 0.036 $\pm$ 0.02                           | 0.035 $\pm$ 0.019 | 0.9             | 6.4 $\pm$ 1.8                                                              |
| Ig $\kappa$ B | Y254L/Q255H                    | 0.67 $\pm$ 0.12                                         | 2.55 $\pm$ 0.11                            | 3.9 $\pm$ 0.15    | 100             | 6.0                                                                        |
| Ig $\kappa$ B | Q111G                          |                                                         |                                            |                   | 2 <sup>a</sup>  | 7.4 $\pm$ 0.6                                                              |
| Ig $\kappa$ B | Y254L,T257A                    |                                                         |                                            |                   | 30 <sup>a</sup> | 2.8                                                                        |

<sup>a</sup>Relative  $K_D$  determined from binding to NF- $\kappa$ B(p50<sub>248–350</sub>/p65<sub>190–321</sub>)
